# Supplementary material for: Ru–W modified graphitic carbon nitride by a monomer complexation synthesis approach from a tailored polyoxometalate: towards electrochemical detection of hydrogen peroxide released by cells
Source: Royal Society of Chemistry journal article supplement (doi:10.1039/d2ay01763f), 2023-01-01
Supplement: d2ay01763f1.pdf [file d2ay01763f1.pdf]

**Ru-W Modified graphitic carbon nitride by monomer complexation synthesis approach  
from tailored polyoxometalate: Towards electrochemical detection of hydrogen peroxide  
released by cells**

Neermunda Shabana<sup>a</sup>, Ajith Mohan Arjun<sup>b</sup>, K Rajendran<sup>a</sup>, Soyeb Pathan<sup>c,d\*</sup>, P Abdul Rasheed<sup>b</sup>  
<sup>a\*</sup>,

<sup>a</sup>Department of Chemistry, Indian Institute of Technology Palakkad, Palakkad, Kerala, India-678  
557

<sup>b</sup>Department of Biological Sciences and Engineering, Indian Institute of Technology Palakkad,  
Palakkad, Kerala, India-678 557

<sup>c</sup>Centre of Research for Development, Parul University, Vadodara, Gujarat, India-391760

<sup>d</sup>Department of Chemistry, Parul Institute of Applied Sciences, Parul University, Vadodara,  
Gujarat, India-391760

**Supporting Information**

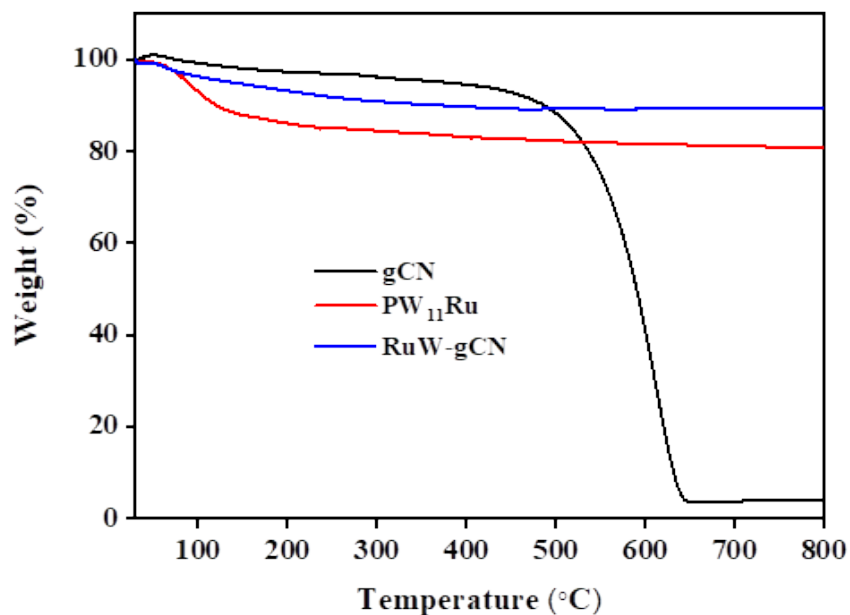

Fig. S1. TGA plot of gCN, PW<sub>11</sub>Ru and RuW-gCN.

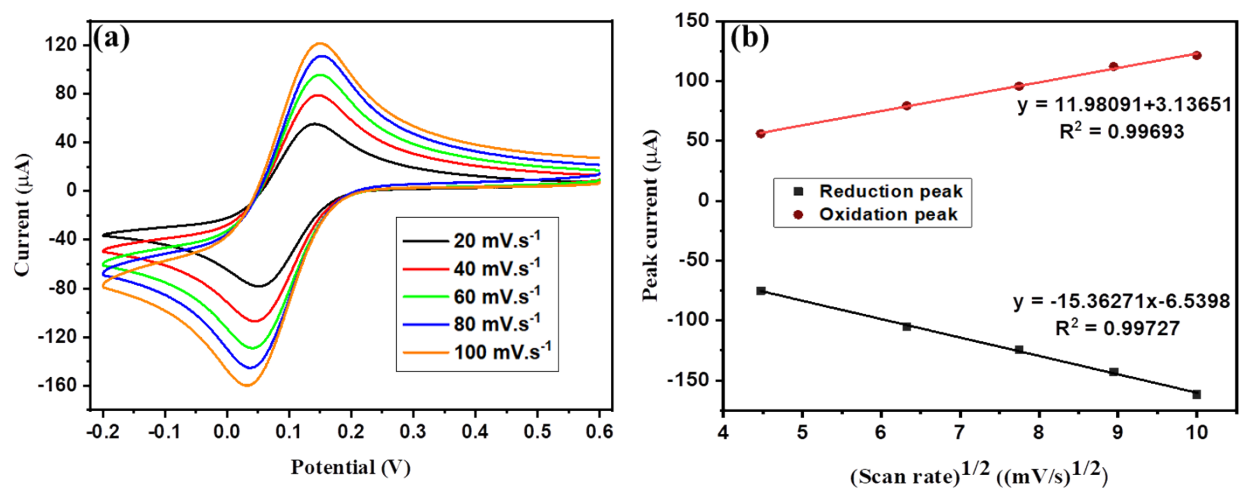

Fig.S2. (a) Cyclic voltammogram of RuW-gCN modified GCE in 0.1 M KCl with 10 mM [Fe(CN)<sub>6</sub>]<sup>3-/4-</sup> at varying scan rate with a potential window from -0.2 V to 0.6 V. (b) The Cottrell plot showing the effect of scan rate on the peak current value.

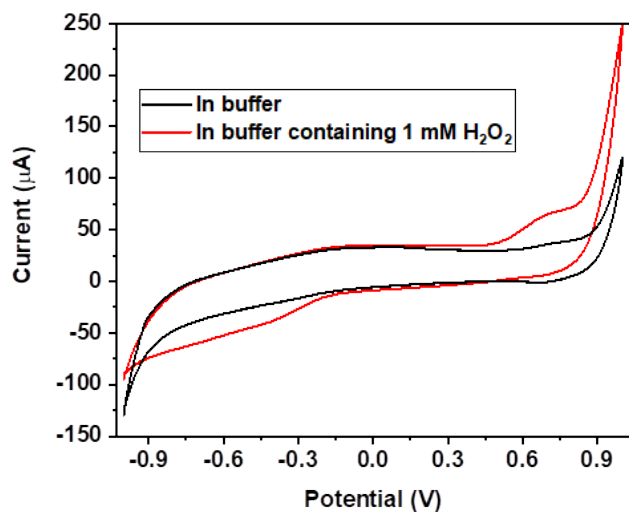

Fig. S3. The CV plot of RuW-gCN modified GCE in 0.1 M PB solution with and without 1 mM  $\text{H}_2\text{O}_2$ .

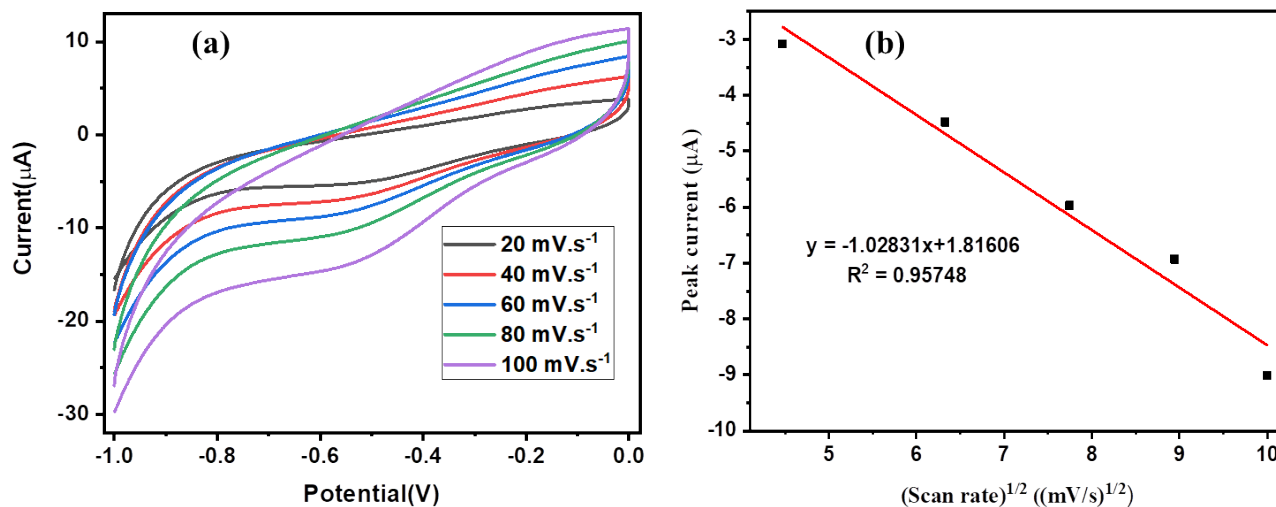

Fig. S4(a). CV plot showing the effect of scan rate on RuW-gCN modified GCE in 0.1 M PB solution at pH 7.4 containing 1 mM  $\text{H}_2\text{O}_2$ . (b) the plot between peak current vs square root of scan rate (Cottrell plot).

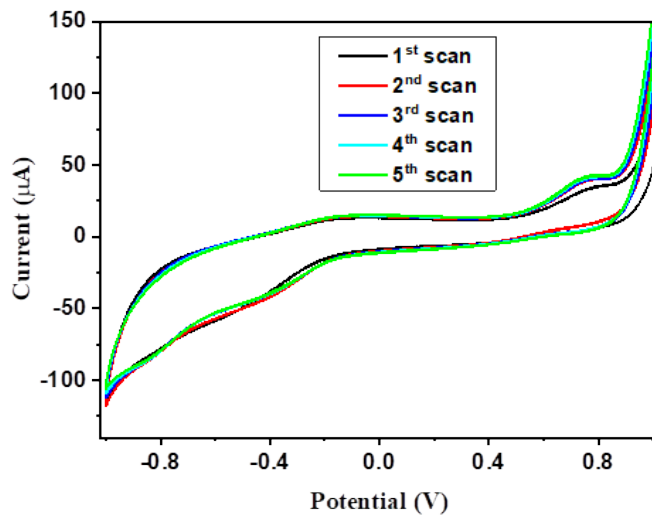

Fig S5. The CV of continuous 5 scans of the same RuW-gCN modified GCE in 0.1 M PB solution containing 10 mM of  $\text{H}_2\text{O}_2$ .

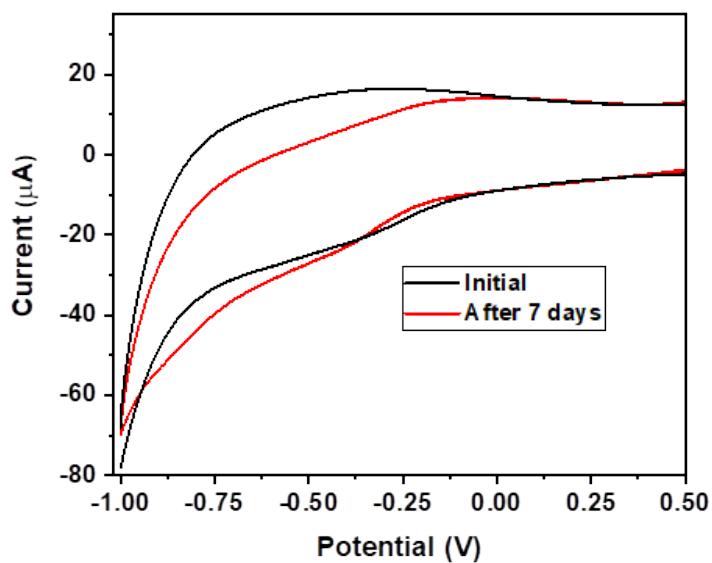

Fig S6. The CV of the RuW-gCN modified GCE after 7 days of storage at room temperature in comparison with initial sensor response. The CV was performed in 0.1 M PB solution containing 1 mM of  $\text{H}_2\text{O}_2$ .

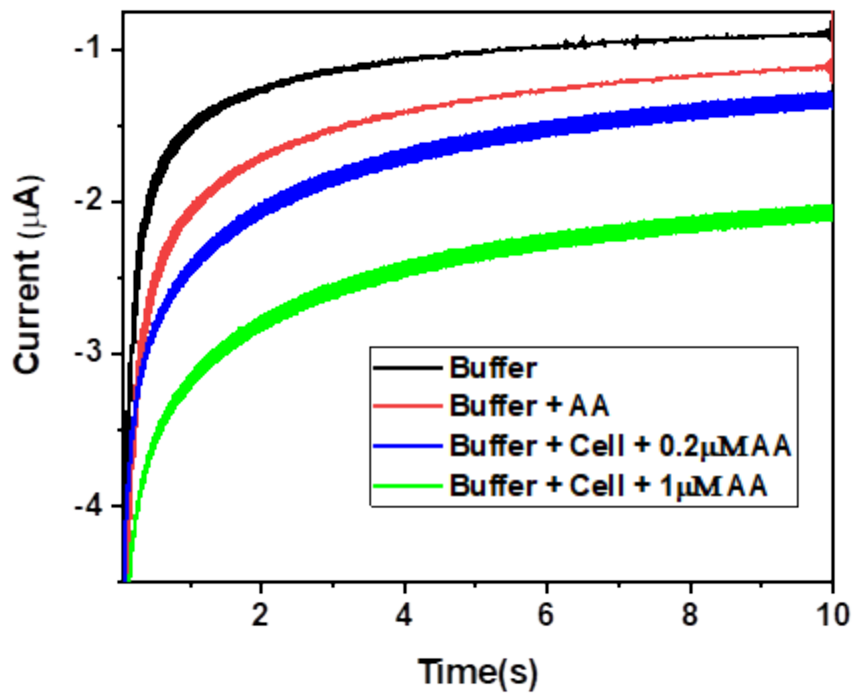

Fig S7. Chronoamperometric response of RuW-gCN modified GCE upon addition of ascorbic acid to the PB solution containing cells. The current value at -0.4 was increased by adding ascorbic acid to the PB solution containing cell suspension.
